# Supplementary material
Source: PubMed Central journal article supplement (PMC2970724)
Supplement: NIHMS231239-supplement-2.pdf [file NIHMS231239-supplement-2.pdf]

**Supplemental Fig. 1.** Kaplan-Meier estimates of overall survival according to treatment in miR-21 positive patients **(A)** compared with miR-21 negative patients **(B)**, in miR-29b positive patients **(C)** compared with miR-29b negative patients **(D)**, in miR-34a positive patients **(E)** compared with miR-34a negative patients **(F)**, in miR-34b positive patients **(G)** compared with miR-34b negative patients **(H)**, in miR-34c positive patients **(I)** compared with miR-34c negative patients **(J)**, in miR-155 positive patients **(K)** compared with miR-155 negative patients **(L)**, in Let-7a positive patients **(M)** compared with Let-7a negative patients **(N)**

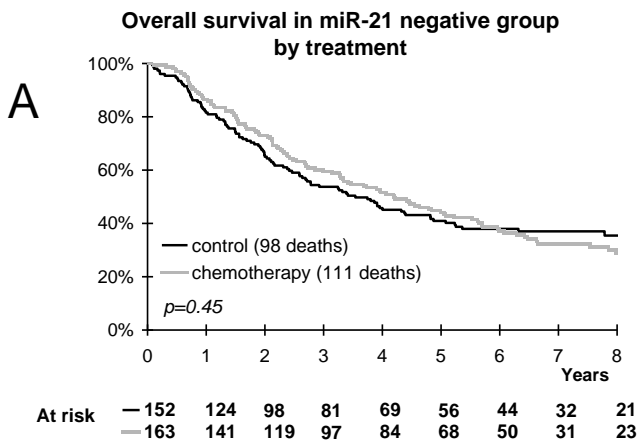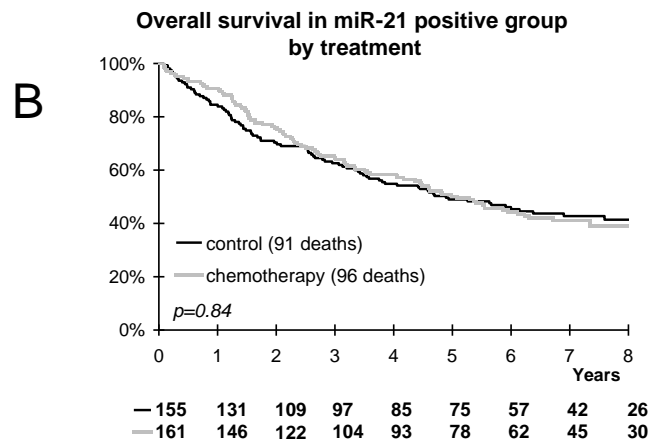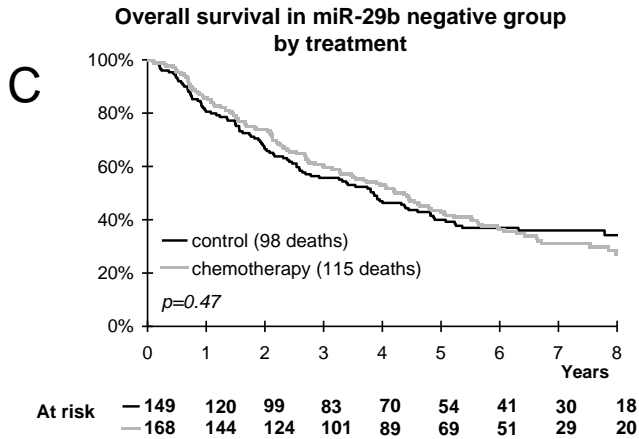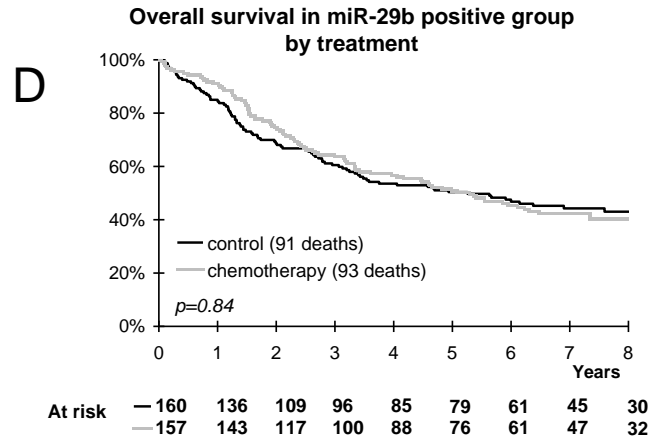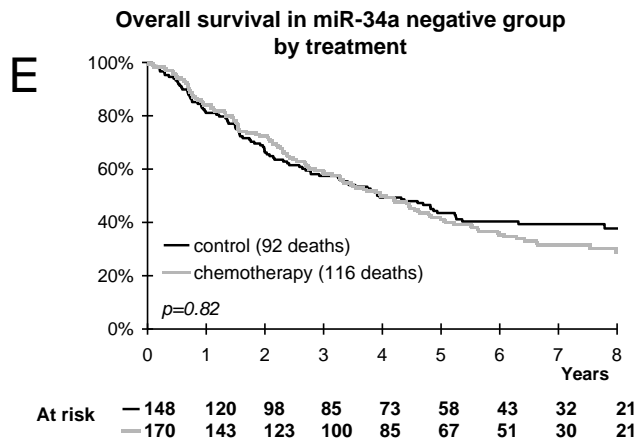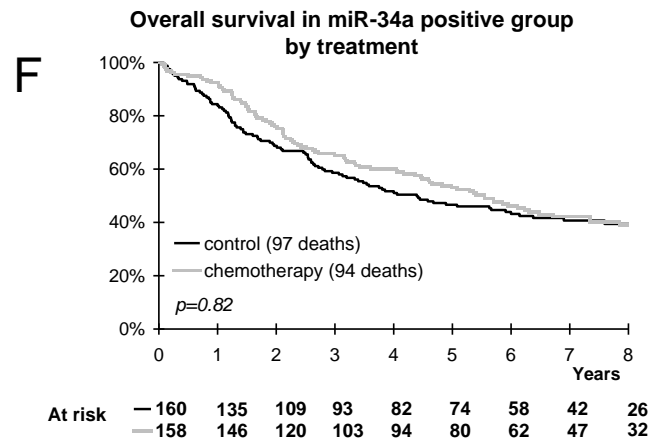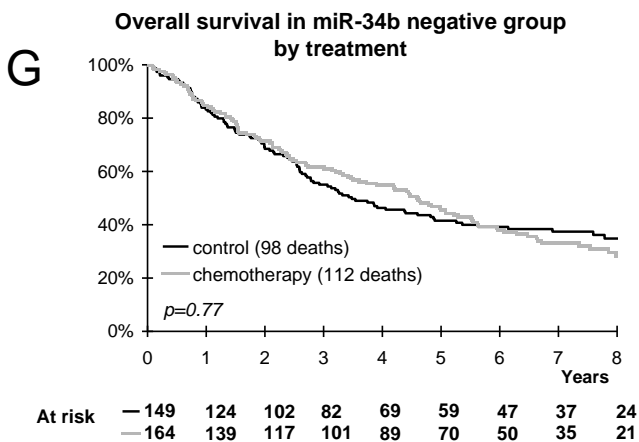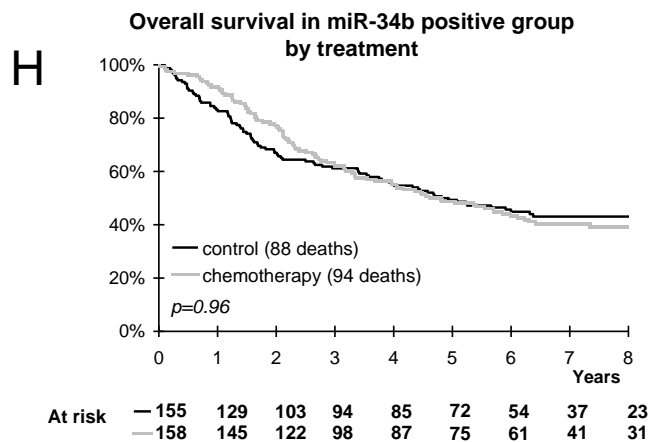

**Overall survival in miR-34c negative group by treatment**

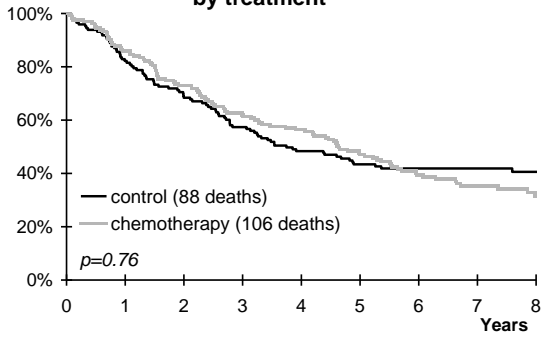

|         |       |     |     |     |    |    |    |    |    |
|---------|-------|-----|-----|-----|----|----|----|----|----|
| At risk | — 146 | 120 | 99  | 83  | 70 | 60 | 47 | 37 | 27 |
|         | — 163 | 140 | 119 | 101 | 91 | 72 | 52 | 35 | 24 |

**Overall survival in miR-34c positive group by treatment**

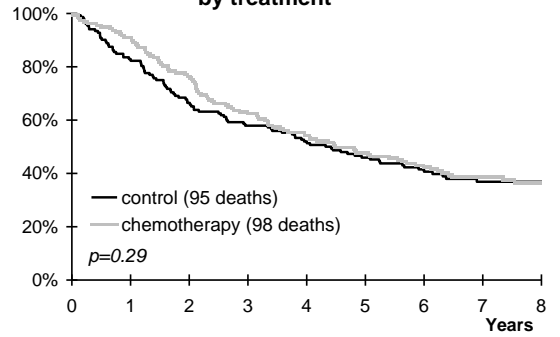

|         |       |     |     |    |    |    |    |    |    |
|---------|-------|-----|-----|----|----|----|----|----|----|
| At risk | — 152 | 126 | 101 | 88 | 79 | 66 | 48 | 33 | 20 |
|         | — 157 | 143 | 120 | 98 | 85 | 73 | 60 | 41 | 28 |

**Overall survival in miR-155 negative group by treatment**

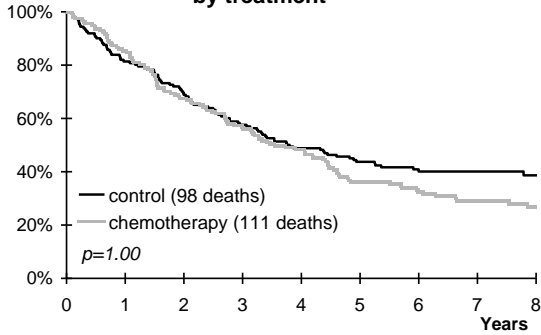

|         |       |     |     |    |    |    |    |    |    |
|---------|-------|-----|-----|----|----|----|----|----|----|
| At risk | — 161 | 131 | 110 | 92 | 78 | 66 | 50 | 39 | 24 |
|         | — 157 | 134 | 106 | 89 | 75 | 52 | 43 | 29 | 21 |

**Overall survival in miR-155 positive group by treatment**

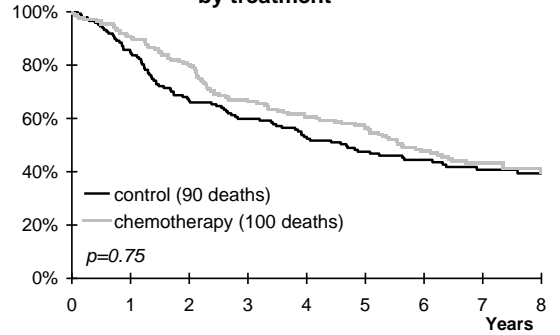

|         |       |     |     |     |     |    |    |    |    |
|---------|-------|-----|-----|-----|-----|----|----|----|----|
| At risk | — 147 | 125 | 98  | 88  | 78  | 67 | 52 | 36 | 24 |
|         | — 172 | 156 | 138 | 114 | 104 | 95 | 70 | 48 | 32 |

**Overall survival in Let-7a negative group by treatment**

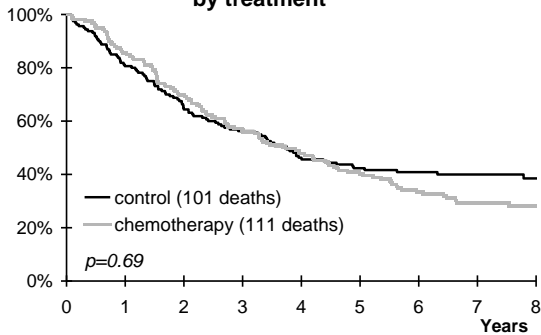

|         |       |     |     |    |    |    |    |    |    |
|---------|-------|-----|-----|----|----|----|----|----|----|
| At risk | — 160 | 129 | 103 | 90 | 74 | 61 | 49 | 34 | 25 |
|         | — 159 | 136 | 111 | 90 | 76 | 62 | 46 | 27 | 19 |

**Overall survival in Let-7a positive group by treatment**

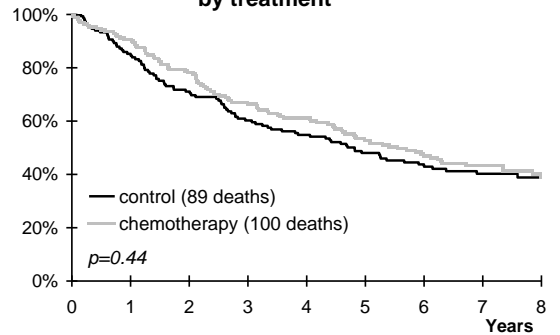

|         |       |     |     |     |     |    |    |    |    |
|---------|-------|-----|-----|-----|-----|----|----|----|----|
| At risk | — 149 | 127 | 105 | 89  | 81  | 71 | 52 | 40 | 23 |
|         | — 170 | 154 | 133 | 113 | 103 | 85 | 67 | 50 | 34 |
